1 Title page

2 **Prediction of multisite pain incidence in adolescence using a machine**  
3 **learning approach**

4 Laura Joensuu<sup>a</sup> Ph.D\*, Ilkka Rautiainen<sup>a</sup> MSc\*, Arto Hautala<sup>a</sup> Ph.D., Kirsti Siekkinen<sup>b</sup> MSc,  
5 Katariina Pirnes<sup>a</sup> Ph.D, Tuija H Tammelin<sup>b</sup> Ph.D.

6 *<sup>a</sup>Faculty of Sport and Health Sciences, University of Jyväskylä, Jyväskylä, Finland, <sup>b</sup> Likes,*  
7 *Jamk University of Applied Sciences, Jyväskylä, Finland*

8 *\*Authors contributed equally*

9 Corresponding Author:

10 Ph.D. Postdoctoral Researcher Laura Joensuu,  
11 Faculty of Sport and Health Sciences, University of Jyväskylä, Rautpohjankatu 8, 40700 Jyväskylä, Finland;  
12 [laura.p.joensuu@jyu.fi](mailto:laura.p.joensuu@jyu.fi), @laurajoensuu, Orcid ID: 0000-0002-9544-6552

## 13 **Key points**

14

15 **Question:** What is the ability of machine learning approach to predict multisite pain  
16 incidence during adolescence?

17

18 **Findings:** With a random forest machine learning method, a broad variety of predictive  
19 physical, lifestyle and psychosocial factors were identified. Prediction ability reached AUC  
20 0.65.

21

22 **Meaning:** The findings highlight that predictors of multisite pain incidence in adolescence  
23 are multifaceted, although the prediction ability of machine learning remained under clinical  
24 relevance (AUC <0.7). These findings support the adoption of holistic and multidisciplinary  
25 prevention approaches for multisite pain in adolescence in the future.

26 **Abstract**

27

28 **Importance**

29 Multisite pain is a major adverse health outcome in the adolescent population, affecting the  
30 daily lives of up to every third adolescent and their families.

31

32 **Objective**

33 To 1) predict multisite pain incidence in the whole body and in the musculoskeletal locations  
34 in adolescents, and 2) explore the sex-specific predictors of multisite pain incidence with a  
35 novel machine learning approach.

36

37 **Design**

38 A 2-year observational study (2013-2015). Three different baseline data sets were utilized to  
39 predict multisite pain incidence during the follow-up.

40

41 **Setting**

42 Population-based sample of Finnish adolescents.

43

44 **Participants**

45 Apparently healthy adolescents.

46

47 **Exposures**

48 The first data set included 48 selected baseline variables relevant for adolescents' health and  
49 wellbeing. Data included information on students self-reported, objectively measured, and  
50 device-based demographics, physical and psychosocial characteristics, and lifestyle factors.

51 The second data set included nine physical fitness variables related to the Finnish national  
52 'Move!' monitoring and surveillance system for health-related fitness. The third data set  
53 included all available baseline data (392 variables).

54

55 **Main Outcome and Measures**

56 Onset of multisite pain (=weekly pain during the past three months manifesting in at least  
57 three sites and not related to any known disease or injury) during the 2-year follow-up in the  
58 whole body or musculoskeletal locations. Musculoskeletal pain sites included the  
59 neck/shoulder, upper extremities, chest, upper back, low back, buttocks, and lower  
60 extremities. Whole body pain sites also the head and abdominal areas. A machine learning  
61 algorithm random forest was utilized.

62

63 **Results**

64 Among 410 participants (57% girls) aged on average 12.5-years (SD 1.2), 16 % of boys and  
65 28 % of girls developed multisite pain in the whole body and 10 % and 15 % in the  
66 musculoskeletal area during follow-up.

67

68 The prediction ability of the machine learning approach with 48 predictive variables reached  
69 an AUC 0.65 at highest. With ML, a broad variety of predictors were identified, with up to 33  
70 variables showing predictive power in girls and 13 in boys.

71

## 72 **Conclusions and Relevance**

73 Findings highlight that rather than any isolated variable, a variety of factors pose a risk for  
74 future multisite pain. More emphasis on holistic and multidisciplinary approaches is  
75 recommended to prevent multisite pain in adolescence.

76 **Introduction**

77 Pain is common in adolescents.<sup>1</sup> Long-lasting pain in at least two bodily locations is reported  
78 by at least every tenth and up to every third adolescent in large cohort studies,<sup>2</sup> with  
79 musculoskeletal locations most common sites for pain.<sup>3</sup> This co-occurrence of pain is typical  
80 in the adolescent population,<sup>4</sup> and hence, multisite pain is recommended to be considered in  
81 clinical practice over isolated pain sites.<sup>2</sup> While the adolescent population is relatively free  
82 from many disabling health outcomes, experiences of pain are associated with a lesser ability  
83 to conduct daily activities. This association follows a dose-response pattern where more pain  
84 sites are associated with a higher degree of disability.<sup>3</sup> The relevance of multisite pain in  
85 adolescence is stressed by pediatric pain researchers.<sup>5</sup> Pain in adolescence is associated with  
86 a broad range of adverse outcomes, from limitations in school attendance and hobbies to  
87 reduced quality of life and depressive symptoms.<sup>6-8</sup> Furthermore, pain experiences tend to  
88 track from childhood and adolescence into adulthood,<sup>9,10</sup> with relevance to, e.g. future work  
89 disability.<sup>11</sup>

90

91 Previous studies have found several cross-sectional correlates with pain. Various biological,  
92 psychosocial, and lifestyle factors, such as age, pubertal status, overweight or obesity,  
93 symptoms of anxiety and depression, chronic health problems, frequent change of residence,  
94 poor academic achievement, leisure screen time, fewer interactions with peers, unhealthy  
95 lifestyles (e.g. sedentary behavior, screen time, inadequate sleep and smoking), and excessive  
96 physical activity, especially in a technical, team, strength, or extreme sports increase the odds  
97 for overall or musculoskeletal pain.<sup>1,2,12-15</sup> In addition, physical fitness is suggested to be  
98 associated with pain in adolescents. Especially the associations of flexibility and muscular  
99 fitness with musculoskeletal pain have been of great interest. Findings remain persistently  
100 inconclusive, although the majority of studies have focused on examining a specific pain

101 site.<sup>16,17</sup> Despite the inconclusive evidence, proper functioning of the musculoskeletal system,  
102 i.e adequate exertion of force, fatigue resistance, and range of motion in the body, is a  
103 rationale for many health-related large-scale monitoring and surveillance systems to  
104 implement fitness testing at the population level.<sup>16,18</sup> Previous findings also indicate that girls  
105 report pain more often than boys,<sup>2,3</sup> and the correlates of pain might be sex-specific,  
106 potentially due to differences in maturation, pain tolerance, or coping behaviors between  
107 sexes.<sup>2,12</sup>

108

109 Less is known about the predictors of pain incidence. Predicting the future onset of multisite  
110 pain has proven to be challenging despite the broad range of potential explanatory factors.  
111 For example, Paananen et al. (2010) did not find statistically significant predictors for  
112 multisite musculoskeletal pain incidence in a 2-year follow-up study.<sup>13</sup> Recently, machine  
113 learning (ML)-based pattern recognition approaches have emerged as promising alternatives  
114 to traditional statistical approaches in modeling complex phenomenon in various areas of  
115 society, including health care.<sup>19</sup> Therefore, the aim of this study was to 1) predict multisite  
116 pain incidence in the musculoskeletal and whole body sites in adolescents and 2) explore the  
117 sex-specific determinants of multisite pain incidence utilizing a novel machine learning  
118 approach.

## 119 **Methods**

### 120 *Study population*

121 This study was part of a research entity related to the Finnish Schools' on the Move program  
122 focusing on physical activity and wellbeing among children and adolescents.<sup>20</sup> A longitudinal  
123 observational study was conducted between January 2013 and June 2015. A total of 1778  
124 students from nine Finnish schools were invited to participate. Out of these, 970 students

125 (53% girls) provided signed written consent with their main caregiver and participated in the  
126 study. After excluding students with possible confounding factors at baseline (such as  
127 guardian-reported existing chronic illnesses or disorders, injuries, existing multisite pain, and  
128 more than 50% of missing data), the final sample consisted of 410 apparently healthy  
129 participants (57% girls) (Figure 1).

130

131 The study setting and measurements were approved by the Ethics Committee of the  
132 University of Jyväskylä, and all procedures were conducted in accordance with the principles  
133 outlined in the Declaration of Helsinki. Participants had the option to discontinue their  
134 involvement at any point during the research. All measurements were conducted by trained  
135 personnel.

### 136 *Outcome*

137 Pain incidence was considered the new onset of multisite pain at any time point during the 2-  
138 year follow-up. Pain symptoms were screened four times after baseline with a structured  
139 questionnaire at six-month intervals: “How often you have had symptoms in the last three  
140 months (in body parts A-I in the pictures below)? Mark the appropriate option. Headache  
141 (A), Neck and shoulder pain / ache (B), Upper extremities pain / ache (C), Chest pain / ache  
142 (D), Upper back pain / ache (E), Low back pain / ache (F), Stomach ache (G), Buttocks pain /  
143 ache (H), Lower extremities pain o/ ache (I)”.<sup>21</sup> The question was supported by an illustration  
144 of the described body parts. The answering options were: “Almost daily, More than once a  
145 week, About once a week, About once a month, Seldom or never.” Students also reported if  
146 the pain originated from trauma: ”Have you injured any of the above-mentioned and pictured  
147 pain areas during the previous 3 months (for example, fallen, stumbled, breached during  
148 sport, etc.)?” The answer options were “yes” or “no” and provided additional information

149 related to the injured body area.

150 Multisite pain was defined as reported weekly pain (almost daily, more than once a week, or  
151 about once a week) in at least three sites during the past three months. Pains due to traumatic  
152 causes were excluded from the analysis. Multisite pain was reported separately for the whole  
153 body and musculoskeletal locations. The pain reported in at least three sites was selected to  
154 reflect the disabling form of multisite pain.<sup>3</sup> Musculoskeletal pain sites included the  
155 neck/shoulder, upper extremities, chest, upper back, low back, buttocks, and lower  
156 extremities. Whole body pain sites included additionally head and abdominal areas.

### 157 *Predictive variables*

158 We aimed to determine the predictors of multisite pain incidence using three different data  
159 sets. First, we included 48 selected baseline variables relevant to adolescents' physical  
160 activity, fitness, health, and wellbeing.<sup>22</sup> The data included information on participants' basic  
161 demographics, physical, psychosocial, and lifestyle characteristics and is presented in detail  
162 elsewhere.<sup>22</sup> The results of these analyses are presented in the main text.

163

164 Secondly, we used baseline physical fitness measurements belonging to the Finnish national  
165 'Move!' monitoring and surveillance system for health-related fitness<sup>23</sup> (nine baseline  
166 variables described in detail elsewhere)<sup>24</sup>. Annually, approximately 100,000 children and  
167 adolescents (approximately 96% of the relevant age groups) participate in 'Move!' creating a  
168 unique database for health-enhancing policies.<sup>18</sup>

169

170 Thirdly, a data-driven approach was used with the whole available data (392 baseline  
171 variables) to explore potential novel predictors of multisite pain incidence. Data included



172 extensive information on students' self-reported, objectively measured, and device-based  
173 demographics, physical and psychosocial characteristics, and physical activity.

#### 174 *Analytical procedures*

175 The random forest (RF) method was applied. All analyses were performed using MATLAB  
176 R2022b with the Statistics and Machine Learning Toolbox and conducted separately for both  
177 sexes. Initial preprocessing and creation of the outcome variable were made using the Python  
178 programming language.

179

180 RF is an ML method where multiple de-correlated decision trees are grown to form a forest.

181 Afterward, this forest is employed as a voting ensemble, where each tree provides an answer  
182 for the prediction task. The final prediction of the forest is the class that gets the most votes  
183 from the individual trees.<sup>25,26</sup>

184

185 10-fold cross-validation (CV) was employed for model assessment. During CV, the data for  
186 each prediction task was divided into 10 subsamples called folds. Nine of these folds, 90% of  
187 the whole data set, were used as the training data to fit the RF model, while one fold, 10% of  
188 the data, was used as the validation data. This procedure was repeated ten times in a rotating  
189 manner, where eventually all the folds had been employed for training and validation. Thus,  
190 all the presented results are based on ten separate data-driven prediction models.

191

192 For each of the 10 CV folds, the trained model was employed to predict the out-of-bag  
193 (OOB) observations i.e., those observations which were not utilized during the training of  
194 each tree, and the validation portion of the data. The main metric recorded was the area the  
195 under receiver operating characteristic curve (AUC). T-tests were performed in MATLAB  
196 for the OOB and validation data AUC results to determine if the means of the CV folds were

197 significantly ( $p < 0.05$ ) above the random level of 0.5. Further analyses regarding the  
198 predictive power of each variable were conducted only in those cases where AUC 95%  
199 Confidence Interval did not violate the 0.5 threshold.

200

201 RF requires choosing several hyperparameters i.e., options that define the model creation. F-  
202 measure for the OOB observations was used as a target during Bayesian optimization,<sup>27</sup>  
203 where several hyperparameters of the RF model were chosen in an automated fashion. Please  
204 see Supplementary methods in Supplement 1 for further information on the target measure,  
205 the hyperparameters, and other details concerning the RF model.

206

207 The contribution of each variable to prediction was estimated using the OOB observations by  
208 a permutation importance measure. A baseline result for the model in each CV fold was the  
209 accuracy of the model with the original data. To estimate the contribution of each variable,  
210 the values of the variables were permuted randomly. The procedure was repeated for all the  
211 variables separately, and the accuracy of the model with permutations was recorded for each  
212 variable. The accuracy obtained using the permuted variable was then subtracted from the  
213 baseline accuracy. The final permutation importance estimate for each variable was the mean  
214 of accuracy change for the 10 CV folds. T-tests were employed also for the importance  
215 estimates. If the change was significantly ( $p < 0.05$ ) over zero, the variable was seen as having  
216 predictive power. Furthermore, if the mean change was near zero or negative, the variable did  
217 not have importance in the prediction. MATLAB's predict function in the TreeBagger class  
218 was utilized to calculate the OOB predictions on the trained model. This function computed  
219 the weighted average of the class posterior probabilities over the trees.

220

221 In further sensitivity analyses the class imbalance was considered, meaning that there are  
222 considerably less observations in diffuse idiopathic pain class, is a challenge in all explored  
223 settings. This issue was approached during the modelling in two separate ways. Firstly, in the  
224 RF model by changing the default cost matrix of misclassification. Cost of misclassifying  
225 true pain class observations to no pain class (false negative classification) was increased to 2,  
226 while the other misclassification (false positive) was left to its default value 1.

227

228 Furthermore, as an alternate view, a synthetic minority oversampling technique for nominal  
229 and continuous data SMOTE-NC,<sup>28</sup> was utilized to see if artificially balancing the training  
230 data by oversampling the pain class observations provided any performance improvements.  
231 Since SMOTE-NC, available in Themis library in R, expected that there are no missing  
232 values in data, missForest imputation for mixed-type data was utilized before oversampling.  
233 As a limitation, due to artificially manipulating the training data, the OOB observations could  
234 not be meaningfully utilized during this experiment and only non-manipulated validation data  
235 for each CV fold was used when estimating the performance measures.

236

237 When estimating the importance of individual variables, the associated risk for each variable  
238 was examined with simple ROC analysis while acknowledging how the variables were coded  
239 in the data. The analysis was done separately from the RF model for the whole age-adjusted  
240 data once without utilizing cross-validation. The analysis was performed only for continuous  
241 and ordinal variables. The identified risk variables are presented in permutation importance  
242 estimate figures with a red panel.

## 243 **Results**

244 At baseline, headache (22.5%, 30.4%) and neck and shoulder pain (13.5%, 18.5%) were the  
245 most prevalent pain symptoms among boys and girls, respectively (Table 1). Sixteen percent

246 of boys and 28.1% of girls experienced multisite pain incidents in the whole body area during  
247 the 2-year follow-up. Multisite pain incidence in the musculoskeletal area was 9.6% and  
248 15.3% in boys and girls, respectively (Table 2).

249

250 The ability of the machine learning approach to predict whole body multisite pain incidence  
251 reached an AUC 0.54 (95% Confidence Interval 0.49 to 0.58) for boys and 0.65 (0.63 to  
252 0.67) for girls (Table 2). The prediction ability for multisite musculoskeletal pain incidence  
253 was AUC 0.65 (0.62 to 0.68) in boys and 0.51 (0.48 to 0.54) in girls.

254

255 The tasks where prediction ability reached above random level (AUC >0.5) were further  
256 analyzed for variable importance. Altogether, 33 variables out of 48 baseline variables  
257 showed predictive power for whole body multisite pain incidence among girls. All variables  
258 are illustrated in Figure 2, and the top ten are described in detail here. Poorer perceived  
259 health, higher perceived fitness, more frequent tiredness on schoolday mornings, having  
260 overweight or obesity based on body mass index, more frequent participation in sports  
261 competitions and matches, more frequent breakfast eating during the school week, a lower  
262 grade point in physical education, a lower amount moderate-to-vigorous physical activity  
263 during leisure time, higher school enjoyment, and higher pubertal status increased the  
264 probability of multisite pain incidence in the whole body area in girls.

265

266 In boys, a total of 13 variables out of 48 showed predictive power for multisite  
267 musculoskeletal pain incidence. The top ten predictors for pain incidence included higher  
268 school strain, lower school enjoyment, a higher participation rate in sports competitions or  
269 matches, lower amounts of continuous device-measured sedentary time, better muscular  
270 fitness measured with the number of push-ups conducted within one minute, a lower body

271 mass index, more active participation in physical activity clubs in school, a later bedtime on  
272 schooldays, lower total sedentary time, and parents' higher willingness to help with  
273 schoolwork (Figure 3).

274

275 Prediction ability with the Move! variables reached above the random level only in boys and  
276 in the whole body area (AUC 0.59 (0.56 to 0.62), eTable 1) and indicated that better  
277 muscular and cardiorespiratory fitness but poorer motor fitness predict higher multisite pain  
278 incidence (eFigure 1). With the full available data set ML, was able to predict multisite pain  
279 incidence only in girls (AUC 0.68 (0.66 to 0.70) and 0.58 (0.56 to 0.60) in whole body and  
280 musculoskeletal sites, respectively) (eTable 2). With the full data, along with physical,  
281 psychosocial, and lifestyle factors, individual pain sites at baseline rose as predictive factors  
282 of future multisite pain (eFigures 2 and 3). Balancing the data artificially with SMOTE-NC  
283 did improve prediction ability (up to AUC 0.72, with high a standard deviation as a result of  
284 the small size of each validation fold), but due to automatic risk threshold selection designed  
285 for earlier tasks, it created suboptimal sensitivity and specificity values (eTables 3-5).

## 286 **Discussion**

287 In this study, we aimed to investigate determinants of multisite pain incidence among the  
288 adolescent population with a novel ML approach. Multisite pain incidence in the study  
289 population was considerable, with up to 16% of boys and 28% of girls developing multisite  
290 weekly pain during the 2-year follow-up. The prediction ability of the ML approach with  
291 selected predictive variables reached an AUC 0.65 at its highest. With ML, a broad variety of  
292 variables predicting multisite pain incidence in adolescents were identified. Out of 48  
293 selected variables, up to 33 variables showed predictive power in girls and 13 in boys. These  
294 findings highlight that rather than any isolated variable, a variety of factors may possess an

295 increased risk for multisite pain and indicate the paradoxical nature of some variables,  
296 especially in girls.

297

298 Multisite pain is a major adverse health outcome in the adolescent population, affecting the  
299 daily lives of more than every fourth adolescent and their families.<sup>1</sup> Predicting the future  
300 onset of multisite pain, identifying individuals potentially experiencing disabling pain in the  
301 future, and recognizing the predictors of pain hold the potential to enhance the quality of life  
302 in this important demographic through better health education and policies. Pediatric experts  
303 have long stressed the importance of pain research and further understanding of pain  
304 epidemiology and underlying pathophysiology through innovative study designs.<sup>5</sup>

305

306 Machine learning-based pattern recognition algorithms, a subgroup of artificial intelligence,  
307 have emerged as promising alternatives to traditional statistical methods in developing next-  
308 generation tools to enhance public health. In contrast to theory-based and often restricted  
309 traditional statistical models, the ML approach enables near unlimited learning capacity from  
310 the available data,<sup>25</sup> providing the potential to develop more precise methods for screening  
311 and predicting adverse health outcomes. ML-based approaches are acknowledged to hold  
312 significant potential for reforming public health policies in the future.<sup>29</sup>

313

314 Previous studies have shown that prediction of multisite pain incidence is demanding,<sup>13</sup> and  
315 the isolated correlates have modest effect sizes.<sup>8</sup> In this current study, the ML approach was  
316 able to predict pain incidence above the random level, however remaining under clinical  
317 relevance (AUC <0.7).<sup>30</sup> Through the ML approach, we found various predictors for multisite  
318 pain incidence, reflecting the previously reported physical, lifestyle, and psychosocial  
319 correlates,<sup>1,2,12-15</sup> and complementing these findings by illustrating the risky variables in a

320 holistic framework alongside the paradoxical nature of some variables. For example, with  
321 whole body multisite pain incidence among girls, indicators of both lower and higher  
322 psychosocial wellbeing (e.g. lower life enjoyment vs. higher school enjoyment), low and high  
323 physical activity (lower amount of moderate-to-vigorous physical activity during leisure time  
324 vs. more days with physical activity for at least 60 min per day), lower body mass index, and  
325 obesity or overweight classification were identified as risk factors. These findings illustrate  
326 that risk factors, especially for whole body multisite pain incidence in girls are complex,  
327 associations are not linear, and individuals with both healthy and unhealthy lifestyles,  
328 favorable or unfavorable psychosocial status might develop multisite pain in the future. In  
329 boys, findings indicated more consistently that poorer psychosocial wellbeing, higher  
330 physical activity, a leaner body, and better physical fitness predict multisite musculoskeletal  
331 pain incidence and support the acknowledgment of overall wellbeing and health-enhancing  
332 physical activity practices among boys to prevent musculoskeletal pain.

333

334 The strengths of this study were the novel application of ML in pain prediction, the  
335 longitudinal study design, and the extensiveness of predictors. The ML approach  
336 considerably extends pain research and provides potential avenues for screening and  
337 modeling complex phenomena in the future. The data was however limited by information  
338 (no data on current medication) and cases (e.g., <66 cases in the data set) with possibly  
339 influencing the generalizability of the findings. ML explores patterns in the data and does not  
340 explain underlying mechanisms or causality. The multicollinearity of the variables might  
341 affect the interpretation of variables with similar phenomenal origins. Self-reported data may  
342 suffer from recall bias, although the reliability of the utilized questionnaire has shown to be  
343 reasonable.<sup>21</sup>

344

345 In conclusion, these novel findings highlight the multifaceted predictors of multisite pain  
346 incidence in adolescents and support the adoption of holistic and multidisciplinary prevention  
347 approaches in the future.

#### 348 **Statements**

349 This study was funded by Ella and Georg Ehrnrooth foundation. Data collection for this study  
350 was supported by the Juho Vainio Foundation (201410342) and the Finnish Ministry of  
351 Education and Culture (OKM/92/626/2013).

#### 352 **Data sharing**

353 Data and utilized scripts are available upon reasonable request from IR (scripts) and THT  
354 (data).

#### 355 **Declaration of interests**

356 We declare no competing interests



357 **References**

- 358 1. King S, Chambers CT, Huguet A, et al. The epidemiology of chronic pain in children and  
359 adolescents revisited: A systematic review. *Pain*. 2011;152(12):2729-2738.  
360 doi:10.1016/j.pain.2011.07.016
- 361 2. Gobina I, Villberg J, Välimaa R, et al. Prevalence of self-reported chronic pain among  
362 adolescents: Evidence from 42 countries and regions. *Eur J Pain*. 2019;23(2):316-326.  
363 doi:10.1002/ejp.1306
- 364 3. Hoftun GB, Romundstad PR, Zwart JA, Rygg M. Chronic idiopathic pain in adolescence –  
365 high prevalence and disability: The young HUNT study 2008. *Pain*. 2011;152(10):2259-  
366 2266. doi:10.1016/j.pain.2011.05.007
- 367 4. Kujala UM, Taimela S, Viljanen T. Leisure physical activity and various pain symptoms  
368 among adolescents. *Br J Sports Med*. 1999;33(5):325-328. doi:10.1136/bjsm.33.5.325
- 369 5. López-Solà M, Suñol M, Timmers I. Brain predictors of multisite pain onset in children.  
370 *Pain*. 2022;163(4):e502-e503. doi:10.1097/j.pain.0000000000002430
- 371 6. Holden S, Rathleff MS, Roos EM, Jensen MB, Pourbordbari N, Graven-Nielsen T. Pain  
372 patterns during adolescence can be grouped into four pain classes with distinct profiles:  
373 A study on a population based cohort of 2953 adolescents. *Eur J Pain*. 2018;22(4):793-  
374 799. doi:10.1002/ejp.1165
- 375 7. Gauntlett-Gilbert J, Eccleston C. Disability in adolescents with chronic pain: Patterns and  
376 predictors across different domains of functioning. *Pain*. 2007;131(1):132-141.  
377 doi:10.1016/j.pain.2006.12.021
- 378 8. Auvinen J, Eskola PJ, Ohtonen HR, et al. Long-term adolescent multi-site musculoskeletal  
379 pain is associated with psychological distress and anxiety. *J Psychosom Res*.  
380 2017;93:28-32. doi:10.1016/j.jpsychores.2016.12.006
- 381 9. Lucas R, Brandão M, Gorito V, Talih M. Refining the prediction of multisite pain in 13-  
382 year-old boys and girls by using parent-reported pain experiences in the first decade of  
383 life. *Eur J Pain*. 2022;26(3):695-708. doi:10.1002/ejp.1898
- 384 10. Kamaleri Y, Natvig B, Ihlebaek CM, Benth JS, Bruusgaard D. Change in the number of  
385 musculoskeletal pain sites: A 14-year prospective study. *Pain*. 2009;141(1):25-30.  
386 doi:10.1016/j.pain.2008.09.013
- 387 11. Kamaleri Y, Natvig B, Ihlebaek CM, Bruusgaard D. Does the number of  
388 musculoskeletal pain sites predict work disability? A 14-year prospective study. *Eur J*  
389 *Pain*. 2009;13(4):426-430. doi:10.1016/j.ejpain.2008.05.009
- 390 12. Hoftun GB, Romundstad PR, Rygg M. Factors Associated With Adolescent Chronic  
391 Non-Specific Pain, Chronic Multisite Pain, and Chronic Pain With High Disability: The  
392 Young–HUNT Study 2008. *J Pain*. 2012;13(9):874-883.  
393 doi:10.1016/j.jpain.2012.06.001

- 394 13. Paananen MV, Taimela SP, Auvinen JP, et al. Risk factors for persistence of multiple  
395 musculoskeletal pains in adolescence: A 2-year follow-up study. *Eur J Pain*.  
396 2010;14(10):1026-1032. doi:10.1016/j.ejpain.2010.03.011
- 397 14. Guddal MH, Stensland SØ, Småstuen MC, Johnsen MB, Zwart JA, Storheim K.  
398 Physical Activity Level and Sport Participation in Relation to Musculoskeletal Pain in a  
399 Population-Based Study of Adolescents: The Young-HUNT Study. *Orthop J Sports  
400 Med*. 2017;5(1):232596711668554. doi:10.1177/2325967116685543
- 401 15. Pirnes KP, Kallio J, Hakonen H, Hautala A, Häkkinen AH, Tammelin T. Physical  
402 activity, screen time and the incidence of neck and shoulder pain in school-aged  
403 children. *Sci Rep*. 2022;12(1):10635. doi:10.1038/s41598-022-14612-0
- 404 16. Plowman S, Meredith M. *Fitnessgram/Activitygram ReferenceGuide*. 4th ed. The  
405 Cooper Institute; 2013.
- 406 17. Pirnes KP, Kallio JJ, Hakonen HJ, et al. Physical fitness characteristics and neck and  
407 shoulder pain incidence in school-aged children—A 2-year follow-up. *Health Sci Rep*.  
408 2022;5(6). doi:10.1002/hsr2.852
- 409 18. Joensuu L, Csányi T, Huhtiniemi M, et al. *How to Design and Establish a National  
410 School-Based Physical Fitness Monitoring and Surveillance System for Children and  
411 Adolescents: The Ten-Step Approach Recommended by the FitBack Network*. Open  
412 Science Framework; 2023. doi:10.31219/osf.io/zsnju
- 413 19. Gevaert AB, Adams V, Bahls M, et al. Towards a personalised approach in exercise-  
414 based cardiovascular rehabilitation: How can translational research help? A ‘call to  
415 action’ from the Section on Secondary Prevention and Cardiac Rehabilitation of the  
416 European Association of Preventive Cardiology. *Eur J Prev Cardiol*. 2020;27(13):1369-  
417 1385. doi:10.1177/2047487319877716
- 418 20. Blom A, Tammelin T, Laine K, Tolonen H. Bright spots, physical activity investments  
419 that work: the Finnish Schools on the Move programme. *Br J Sports Med*.  
420 2018;52(13):820-822. doi:10.1136/bjsports-2017-097711
- 421 21. Pirnes KP, Kallio J, Siekkinen K, Hakonen H, Häkkinen A, Tammelin T. Test-retest  
422 repeatability of questionnaire for pain symptoms for school children aged 10–15 years.  
423 *Scand J Pain*. 2019;19(3):575-582. doi:10.1515/sjpain-2018-0338
- 424 22. Joensuu L, Rautiainen I, Äyrämö S, et al. Precision exercise medicine: predicting  
425 unfavourable status and development in the 20-m shuttle run test performance in  
426 adolescence with machine learning. *BMJ Open Sport Exerc Med*. 2021;7(2):e001053.  
427 doi:10.1136/bmjsem-2021-001053
- 428 23. Move! <https://www.oph.fi/en/move>
- 429 24. Joensuu L, Syväoja H, Kallio J, Kulmala J, Kujala UM, Tammelin TH. Objectively  
430 measured physical activity, body composition and physical fitness: Cross-sectional  
431 associations in 9- to 15-year-old children. *Eur J Sport Sci*. 2018;18(6):882-892.  
432 doi:10.1080/17461391.2018.1457081

- 433 25. Breiman L. Random Forests. *Mach Learn.* 2001;45(1):5-32.  
434 doi:10.1023/A:1010933404324
- 435 26. Hastie T, Friedman J, Tibshirani R. *The Elements of Statistical Learning*. Springer New  
436 York; 2001. doi:10.1007/978-0-387-21606-5
- 437 27. Snoek J, Larochelle H, Adams RP. Practical Bayesian Optimization of Machine  
438 Learning Algorithms. In: Pereira F, Burges CJ, Bottou L, Weinberger KQ, eds.  
439 *Advances in Neural Information Processing Systems*. Vol 25. Curran Associates, Inc.;  
440 2012.  
441 [https://proceedings.neurips.cc/paper\\_files/paper/2012/file/05311655a15b75fab86956663](https://proceedings.neurips.cc/paper_files/paper/2012/file/05311655a15b75fab86956663e1819cd-Paper.pdf)  
442 [e1819cd-Paper.pdf](https://proceedings.neurips.cc/paper_files/paper/2012/file/05311655a15b75fab86956663e1819cd-Paper.pdf)
- 443 28. Chawla NV, Bowyer KW, Hall LO, Kegelmeyer WP. SMOTE: Synthetic Minority  
444 Over-sampling Technique. *J Artif Intell Res.* 2002;16:321-357. doi:10.1613/jair.953
- 445 29. *Horizon Europe Work Programme 2023-2024, 4. Health.*; 2022.
- 446 30. Hosmer D, Lemeshow S. Chapter 5. In: *Applied Logistic Regression*. 2nd ed. John Wiley  
447 and Sons; 2000:160-164.
- 448

449 **Tables**

450 Table 1. Selected subject demographics at baseline by sex.

| <b>N=410</b>                                     | <b>Boys</b>  | <b>Girls</b> |
|--------------------------------------------------|--------------|--------------|
| <b>Characteristic</b>                            |              |              |
| N                                                | 175 (42.6 %) | 235 (57.3 %) |
| Age (years)                                      | 12.5 (1.2)   | 12.5 (1.2)   |
| Height (cm)                                      | 156.7 (10.9) | 155.1 (9.6)  |
| Weight (kg)                                      | 46.1 (12.2)  | 45.4 (10.1)  |
| BMI (kg/m <sup>2</sup> )                         | 18.5 (3.2)   | 18.7 (3.0)   |
| <b>Pain at different body sites</b>              |              |              |
| <b>Musculoskeletal pain sites</b>                |              |              |
| Neck/Shoulder (%)                                | 23 (13.6 %)  | 42 (18.5 %)  |
| Upper extremities (%)                            | 7 (4.1 %)    | 10 (4.4 %)   |
| Chest (%)                                        | 1 (0.6 %)    | 2 (0.9 %)    |
| Upper back (%)                                   | 5 (3.0 %)    | 5 (2.2 %)    |
| Low back (%)                                     | 8 (4.7 %)    | 8 (3.5 %)    |
| Buttocks (%)                                     | 2 (1.2 %)    | 6 (2.6 %)    |
| Lower extremities (%)                            | 9 (5.3 %)    | 13 (5.7 %)   |
| <b>Other pain sites</b>                          |              |              |
| Head (%)                                         | 38 (22.5 %)  | 69 (30.4 %)  |
| Abdominal (%)                                    | 18 (10.7 %)  | 36 (15.9 %)  |
| <b>Physical activity and fitness</b>             |              |              |
| Moderate-to-vigorous physical activity (min/day) | 58.3 (24.2)  | 47.4 (18.3)  |
| Sedentary time (hours/day)                       | 8.1 (1.3)    | 8.6 (1.1)    |
| Physical fitness index (Move-index)              | 16.6 (4.1)   | 17.2 (3.6)   |

451 Values are means and standard deviations for continues variables and proportions of participants for others. BMI, Body mass index; Move-  
 452 index, weighted sum of the Finnish national Move! monitoring system's fitness items.

453

454

455 Table 2. Prediction ability of machine learning for multisite pain incidence among  
456 adolescents.

| Multisite pain incidence     | Cases/N | Prediction ability  |                     |                     |
|------------------------------|---------|---------------------|---------------------|---------------------|
|                              |         | AUC (95 % CI)       | Sensitivity         | Specificity         |
| <b>All body sites</b>        |         |                     |                     |                     |
| Boys                         | 28/175  | 0.54 (0.49 to 0.58) | 0.75 (0.64 to 0.86) | 0.43 (0.30 to 0.55) |
| Girls                        | 66/235  | 0.65 (0.63 to 0.67) | 0.72 (0.67 to 0.78) | 0.58 (0.53 to 0.62) |
| <b>Musculoskeletal sites</b> |         |                     |                     |                     |
| Boys                         | 17/178  | 0.65 (0.62 to 0.68) | 0.72 (0.58 to 0.87) | 0.65 (0.54 to 0.76) |
| Girls                        | 36/235  | 0.51 (0.48 to 0.54) | 0.81 (0.75 to 0.87) | 0.37 (0.28 to 0.46) |

457 AUC results are estimated from the out-of-bag observations using the 10-fold cross-validation.

458

## 459 **Figure legends**

460 Figure 1. Flow chart of the exclusion process

461 Figure 2. Permutation importance estimates for girls in the *selected set* for *all sites* (AUC  
462 0.65). Red panel, risk factors; PA, physical activity; Counts, accelerometer total activity  
463 counts

464 Figure 3. Permutation importance estimates for boys in the *selected set* for *musculoskeletal*  
465 *sites* (AUC 0.65). Red panel, risk factors; PA, physical activity; Counts, accelerometer total  
466 activity counts

# Original data

Whole body

Musculoskeletal locations

**N=970**  
Boys N=462  
Girls N=508

## Exclusion criteria

1) Multisite pain reported at baseline.

### Whole body

Excluded: 146 (67 boys, 79 girls)

### Musculoskeletal locations

Excluded: 71 (38 boys, 33 girls)

2) A known existing disorder at baseline.

Excluded: 50 (30 boys, 20 girls)

Excluded: 58 (32 boys, 26 girls)

3) Self-reported injury at any location during the last three months at baseline.

Excluded: 346 (181 boys, 165 girls)

Excluded: 373 (189 boys, 184 girls)

4) A student is completely excluded if none of the follow-ups have usable data i.e., data is either missing or there is a self-reported injury in all four follow-ups.

Excluded: 10 (5 boys, 5 girls)

Excluded: 28 (2 boys, 26 girls)

Forming of the response variable for remaining students

Forming of the response variable for remaining students

Removing students where more than 50 % of variables are missing (done separately for each three data configurations)

### **N=410 (larger set)**

Boys N=175, where multisite pain observations: 28  
Girls N=235, where multisite pain observations: 66

### **N=413 (larger set)**

Boys N=178, where multisite pain observations: 17  
Girls N=235, where multisite pain observations: 35

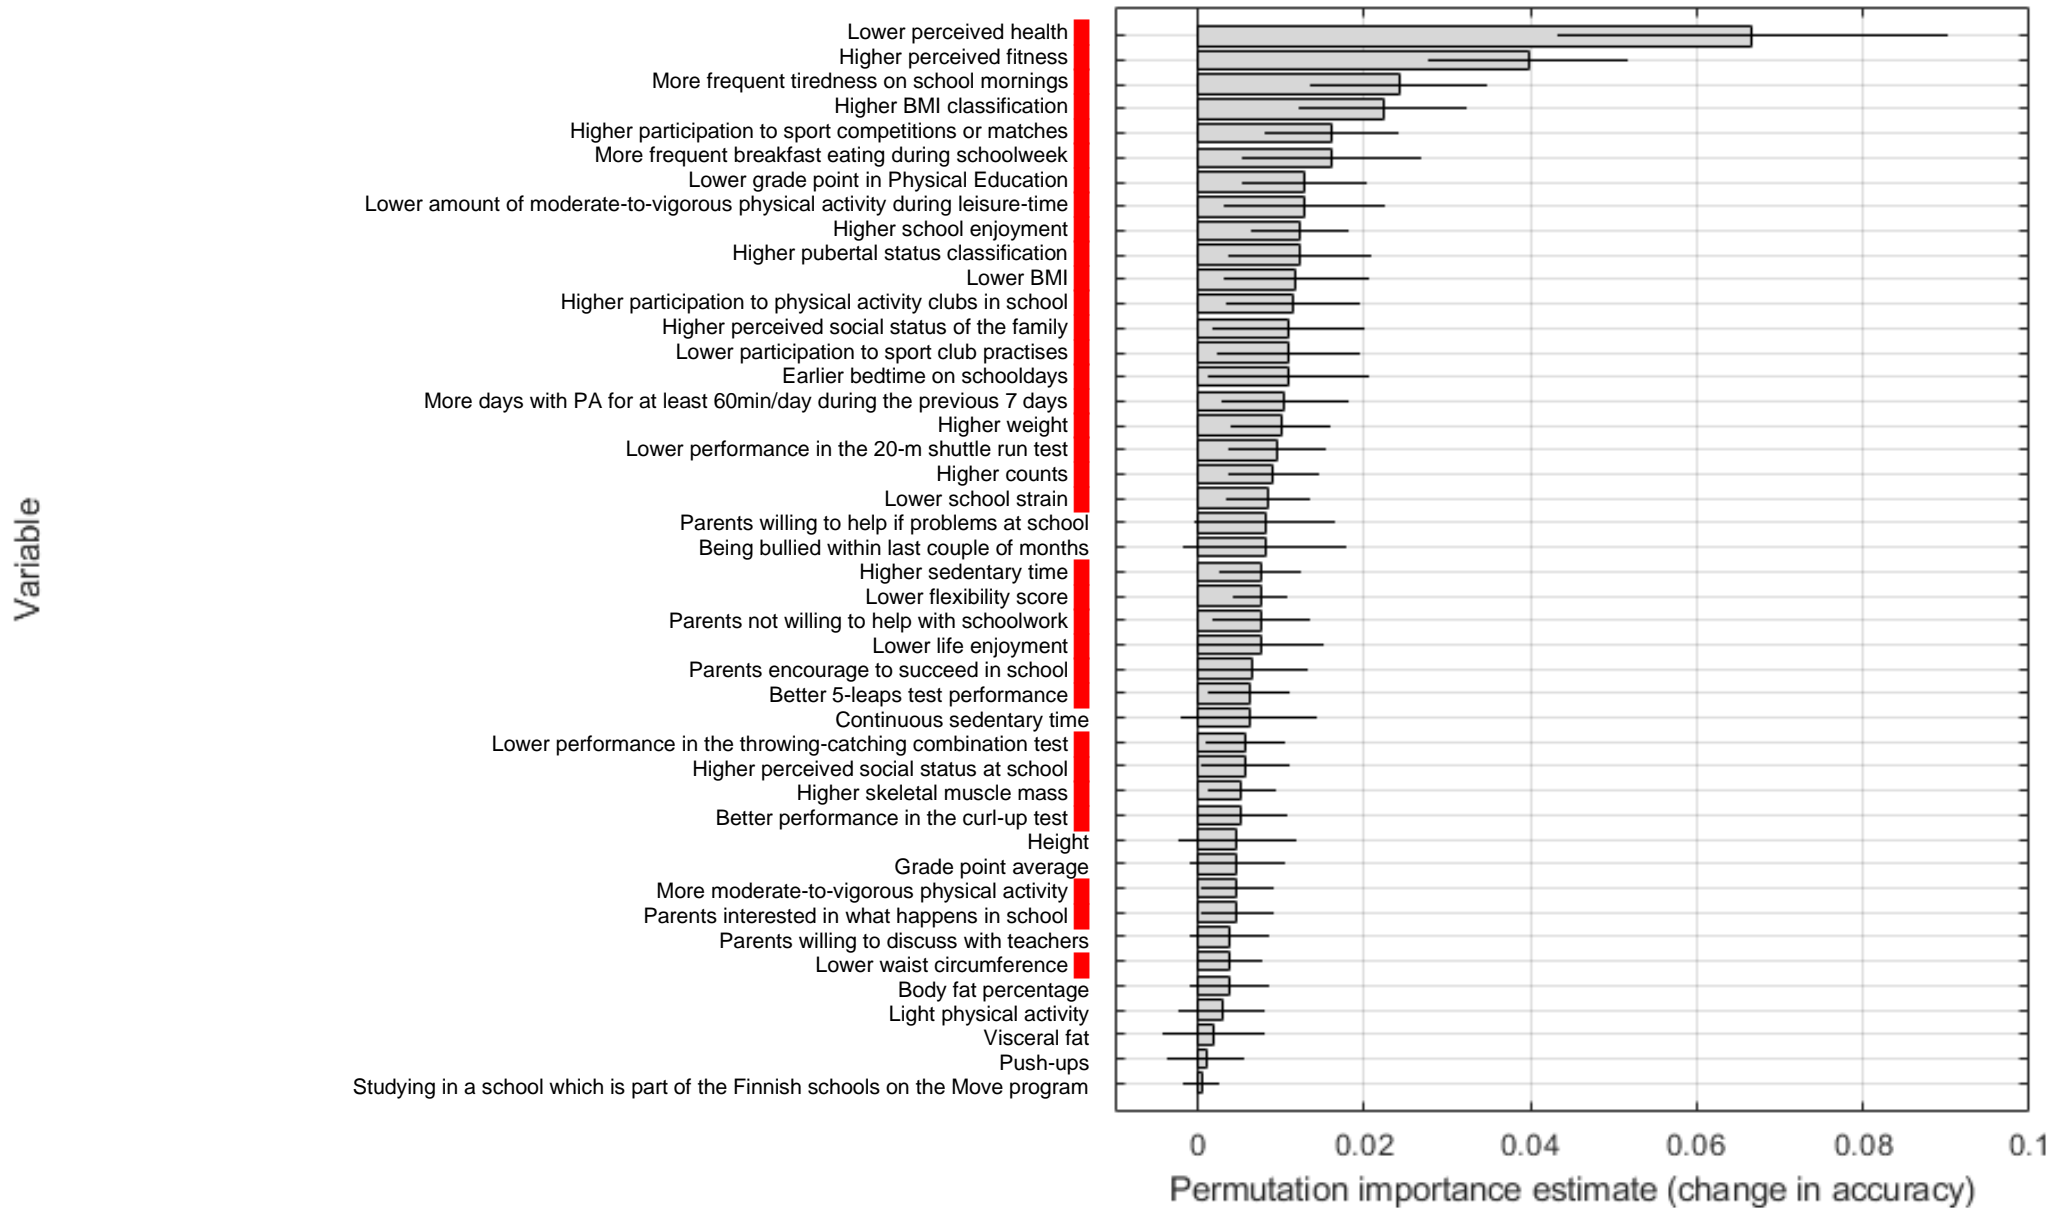

Figure 2. Permutation importance estimates for girls in the *selected set* for *all sites* (AUC 0.65). Red panel, risk factors; PA, physical activity; Counts, accelerometer total activity counts

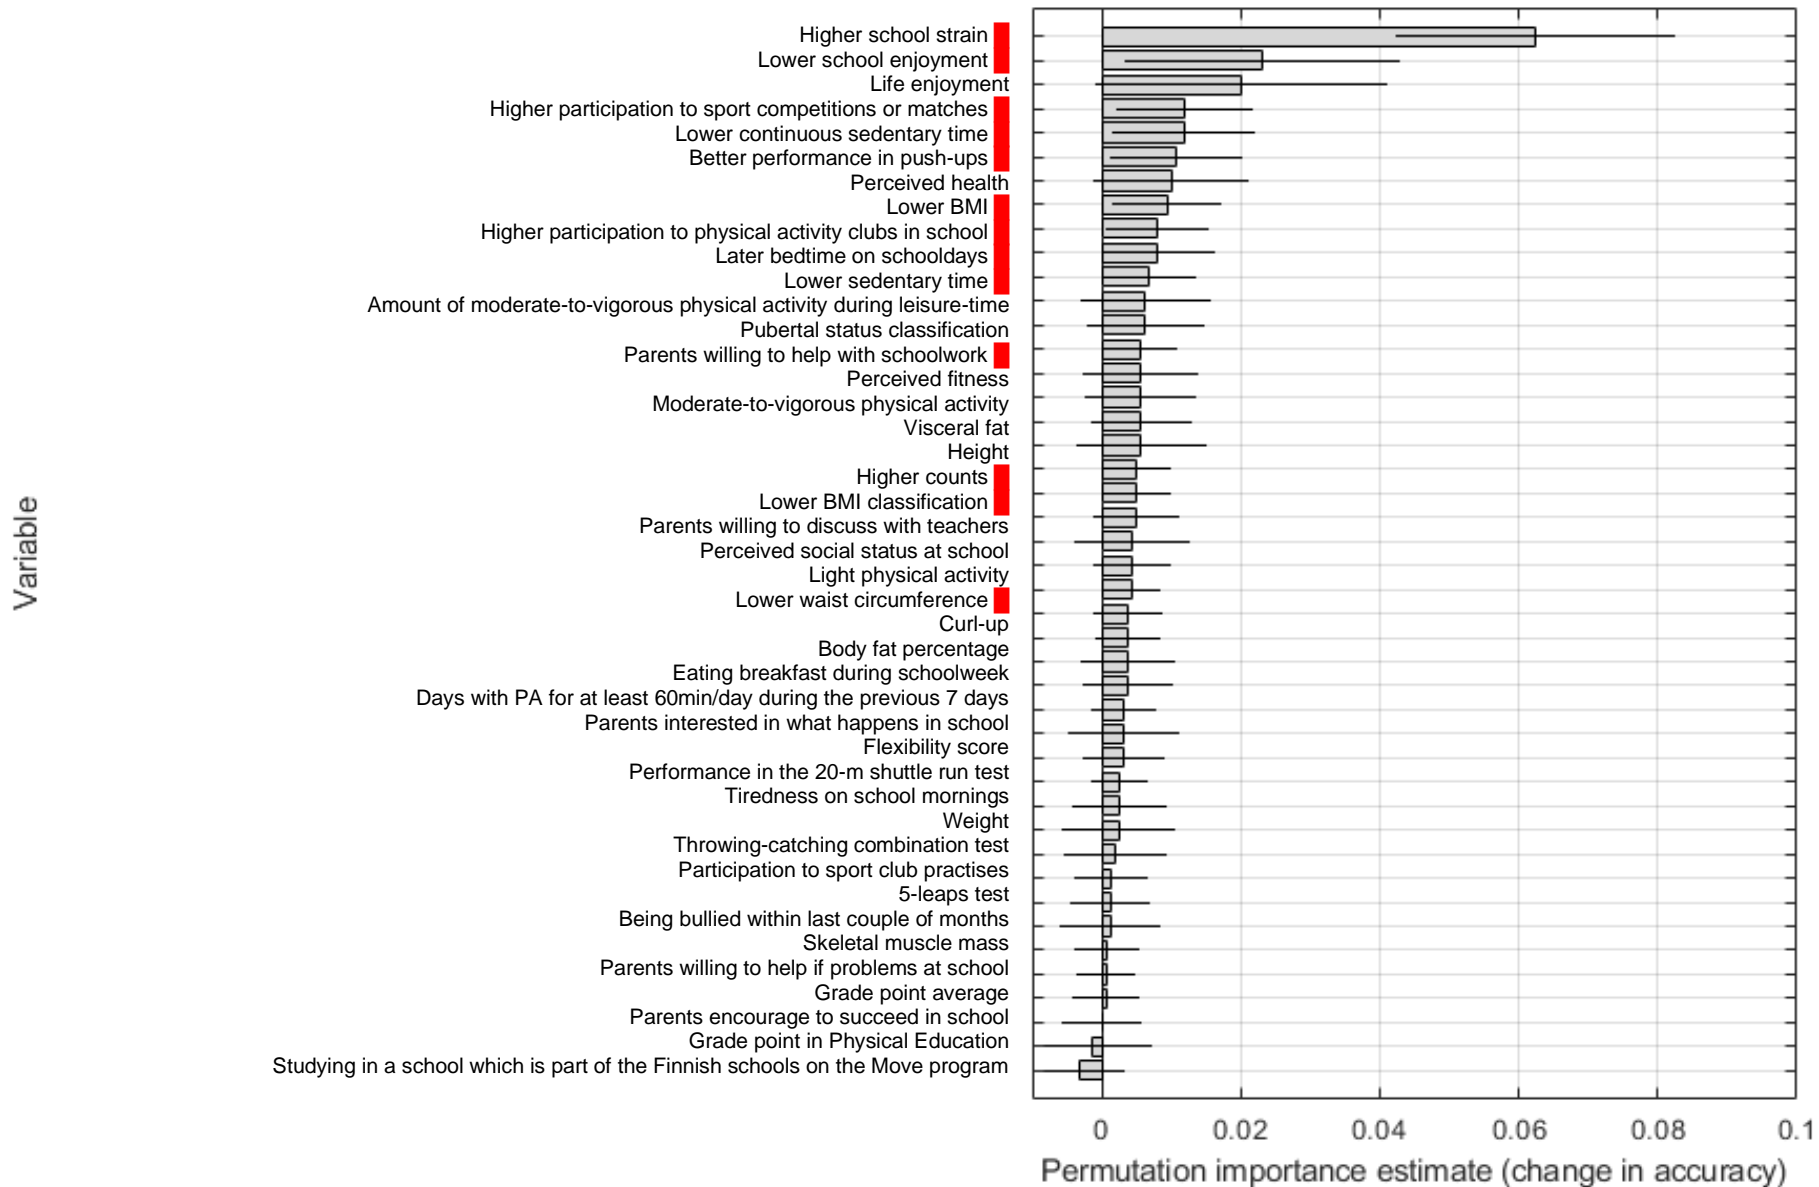

Figure 3. Permutation importance estimates for boys in the *selected set* for *musculoskeletal sites* (AUC 0.65). Red panel, risk factors; PA, physical activity; Counts, accelerometer total activity counts
